# Supplementary material for: Identification and validation of supervariants reveal novel loci associated with human white matter microstructure
Source: Genome Res. 2024 Jan;34(1):20–33. doi: 10.1101/gr.277905.123 (PMC10904010; doi:10.1101/gr.277905.123)
Supplement: Supplement 11 [file Supplemental_Table_S11.xlsx]

## Sheet: Table_1
Table S11. ID and full name of 21 white matter tracts
Track	Full name
ACR	Anterior corona radiata
ALIC	Anterior limb of internal capsule
BCC	Body of corpus callosum
CGC	Cingulum (cingulate gyrus)
CGH	Cingulum (hippocampus)
CST	Corticospinal tract
EC	External capsule
FX	Fornix
FXST	Fornix-stria terminalis
GCC	Genu of corpus callosum
IFO	Inferior fronto-occipital fasciculus
PCR	Posterior corona radiata
PLIC	Posterior limb of internal capsule
PTR	Posterior thalamic radiation
RLIC	Retrolenticular part of internal capsule
SCC	Splenium of corpus callosum
SCR	Superior corona radiata
SFO	Superior fronto-occipital fasciculus
SLF	Superior longitudinal fasciculus
SS	Sagittal stratum
UNC	Uncinate fasciculus
